# Supplementary material
Source: MDPI journal article supplement (https://www.mdpi.com/2311-7524/9/2/158)
Supplement: s1 [file s1]

## Supplementary Materials:

**Table S1.** Overview of the resistance tests carried out in the complete and partial screening. x represents complete runs (control, Foxy II and Foxy III with 10 seedlings each). Deviations are defined more precisely.

| Genotype                   |               | Resistance test          |                    |
|----------------------------|---------------|--------------------------|--------------------|
|                            |               | complete screening       | partial screening  |
| <i>A. aethiopicus</i>      | wild relative | x                        | x                  |
| <i>A. amarus</i>           | wild relative | x                        | x                  |
| <i>A. densiflorus</i>      | wild relative | control + Foxy III       | -                  |
| <i>A. stipularis</i>       | wild relative | control + Foxy III       | -                  |
| CGN25609                   | landraces     | x                        | -                  |
| CGN25611                   | landraces     | (Foxy III only 9 plants) | -                  |
| Argenteuil                 | cultivar      | x                        | x                  |
| Grolim                     | cultivar      | x                        | -                  |
| Ivancicky                  | cultivar      | x                        | x                  |
| Leistungsauselese          | cultivar      | x                        | control + Foxy III |
| Ramada                     | cultivar      | x                        | x                  |
| Ramires                    | cultivar      | x                        | x                  |
| Ravel                      | cultivar      | x                        | x                  |
| Ruhm von Braunschweig      | cultivar      | (control only 6 plants)  | -                  |
| Schwetzingen Meisterschuss | cultivar      | x                        | x                  |
| Start                      | cultivar      | x                        | x                  |
| Thielim                    | cultivar      | x                        | x                  |

**Table S2.** Resistance test against *Fusarium oxysporum* isolates Foxy II and Foxy III, 14 dpi. Comparison of the percentage of diseased tissue measured in complete and partial resistance screening for *A. amarus*, *A. aethiopicus*, *A. officinalis* cv. Ravel, and *A. officinalis* cv. Start. Asterisks behind the average and SE show significant differences between the complete and partial resistance screening ( $p < 0.05$ ). <sup>Δ</sup> indicates significance between control and Foxy II or Foxy III for each genotype ( $p < 0.05$ ).

| Genotype | control            |                   | Foxy II                    |                            | Foxy III                  |                           |
|----------|--------------------|-------------------|----------------------------|----------------------------|---------------------------|---------------------------|
|          | complete screening | partial screening | complete screening         | partial screening          | complete screening        | partial screening         |
| 1        | 9.37 ± 0.69        | 10.08 ± 0.98      | 25.76 ± 1.00* <sup>Δ</sup> | 17.78 ± 1.41* <sup>Δ</sup> | 25.98 ± 2.34 <sup>Δ</sup> | 31.69 ± 2.62 <sup>Δ</sup> |
| 2        | 26.34 ± 1.34       | 29.05 ± 1.44      | 24.56 ± 1.30*              | 30.22 ± 1.69* <sup>Δ</sup> | 26.87 ± 0.96              | 31.86 ± 2.18 <sup>Δ</sup> |
| 13       | 15.12 ± 0.94*      | 13.19 ± 1.09*     | 28.99 ± 1.95* <sup>Δ</sup> | 23.03 ± 1.83* <sup>Δ</sup> | 21.92 ± 1.96 <sup>Δ</sup> | 22.79 ± 1.80 <sup>Δ</sup> |
| 16       | 14.1 ± 1.13        | 15.93 ± 1.05      | 20.04 ± 1.57 <sup>Δ</sup>  | 21.97 ± 1.35 <sup>Δ</sup>  | 39.56 ± 3.65 <sup>Δ</sup> | 30.15 ± 2.72 <sup>Δ</sup> |

**Table S3.** SSR primer used for the distance analysis.

| SSR marker | Forward primer <sup>1</sup> | Reverse primer        | Fragment size range (bp) <sup>2</sup> |
|------------|-----------------------------|-----------------------|---------------------------------------|
| asp c45    | GGAGGAATGCCGACAAGG          | TTTCTTCAATCGATCTCTGG  | 105-116                               |
| asp c957   | TGATGAACCACTCAATACATTCG     | TGTGTCTTGTGTTGTGGTGC  | 117-134                               |
| asp c1319  | TGCTCAAGGCGTATGTGAAG        | ACTGATTCTCGCTTTGCAGG  | 154-182                               |
| asp c1401  | AATGGTTGCCAATGGAGAAG        | GCCTGCAGTGTCAATCAGTGT | 161-175                               |
| asp c1505  | ATCCCACGCACTGGTAAATC        | AGGATATGGTTATGGCGGTG  | 99-156                                |
| asp c1779  | CTGTGACATTAGCACAACTTAGCA    | CAACCTTTCCTCGGAACGTA  | 163-180                               |
| asp c2370  | AGCCTGCCATAATCCTTTCC        | TCCCTCTCCACATCTCTTCG  | 167-184                               |
| asp c3803  | TAAACTGATGGTGAGGCTCG        | TTGTAGGCGGCAGGCTATT   | 130-158                               |
| asp c4593  | TCCTCCTTCGACACCTTCAG        | GACTCCGGAATCGAGAAGC   | 149-167                               |
| asp c5587  | TTTGTGGAGGGAGAGGGAG         | CCACAAACAACCTTTCATCC  | 121-137                               |
| asp c6290  | CGGCGATAAATTGAAAGACC        | ACTCAAGAAGCCGGAGGAAT  | 108-140                               |
| asp c6470  | AGAAAGTCACGGGCCTCC          | TATCCTCCTCCTGATTCGCA  | 207-234                               |
| asp c8280  | CAATCTCTCCACAAGCTCA         | GATTGCTGGATTTGGTGAGG  | 121-169                               |
| asp c9020  | GCAGCCAACCCTAGAAACAA        | TATTATGAGCCTGTGGCTGG  | 94-140                                |
| asp c9810  | AGGCAGAAGCTGAAGAGGC         | TTCTTGCTCTCTGTTCCAGC  | 114-150                               |
| asp c11979 | CAGAAGGTGTATTGTTTGCCC       | CCTCTTCATCTTGGCTTTCA  | 174-204                               |
| asp c12796 | TGAATCGGGATCAAATTAGAGG      | CGTTATCCTCACGACCCAAT  | 110-133                               |
| asp c12877 | GAACGCATAGTACATGGCAAA       | TTGATATCGATCTTGCTCGC  | 98-133                                |
| asp c14231 | CCACAGGATGCAAGTCCTTC        | AGAGAGACTCGGGCTCATTG  | 129-157                               |
| asp c15627 | CTCTCATTGTTGAAACGAGC        | TGCTGCGATGCTAGAGAAGA  | 105-125                               |
| asp c17381 | AGGGCTCCCAGTATCCAGTC        | TTCATTGAACATGGCATTCTG | 151-171                               |
| asp c17476 | AAGCCAGCCACAAGAACCTA        | AAGAGCCTTGGCTAGCGTTT  | 159-198                               |
| asp c21312 | CCTCCAGTTCCCATCAGAAG        | GGCTATAACCGTGGAGGAGG  | 122-135                               |
| asp c22306 | GATCATCATCTTGCGCATTG        | AGAGGAAGCACGAGGAAGAA  | 164-171                               |
| asp c22357 | CAATCGACGGAGGAGAAAGA        | AAGGCTTGTCTTCCATAGCG  | 113-140                               |

<sup>1</sup> All forward primer were 5' elongated by the 19 bp M13 sequence CACGACGTTGTAAAACGAC.

<sup>2</sup> Fragment size range in the tested material.

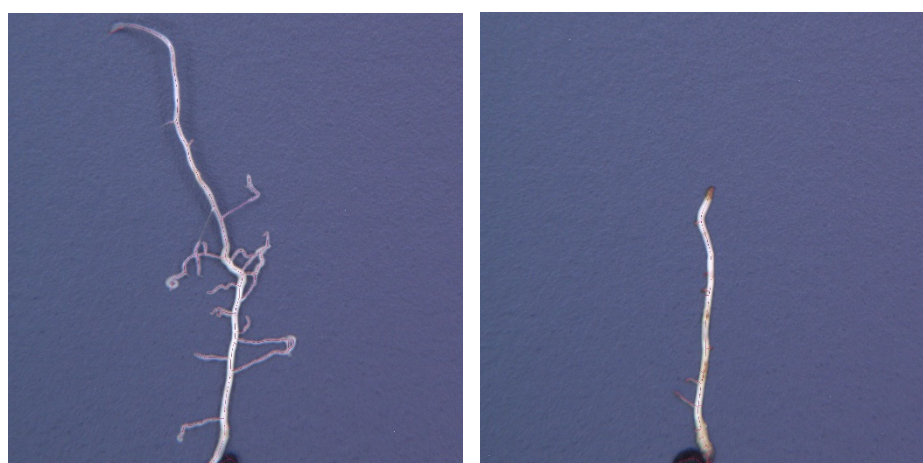

(a)

(b)

**Figure S1.** Analysis of root length evaluated with LemnaTec Scanalyzer PL. *A. officinalis* cv. Grolim 14 dpi. (a) Control; (b) Foxy III.
